# Supplementary material for: Type 2 diabetes mellitus in Bangladesh: a prevalence based cost-of-illness study
Source: Springer Nature journal article supplement (doi:10.1186/s12913-019-4440-3), 2019-08-27

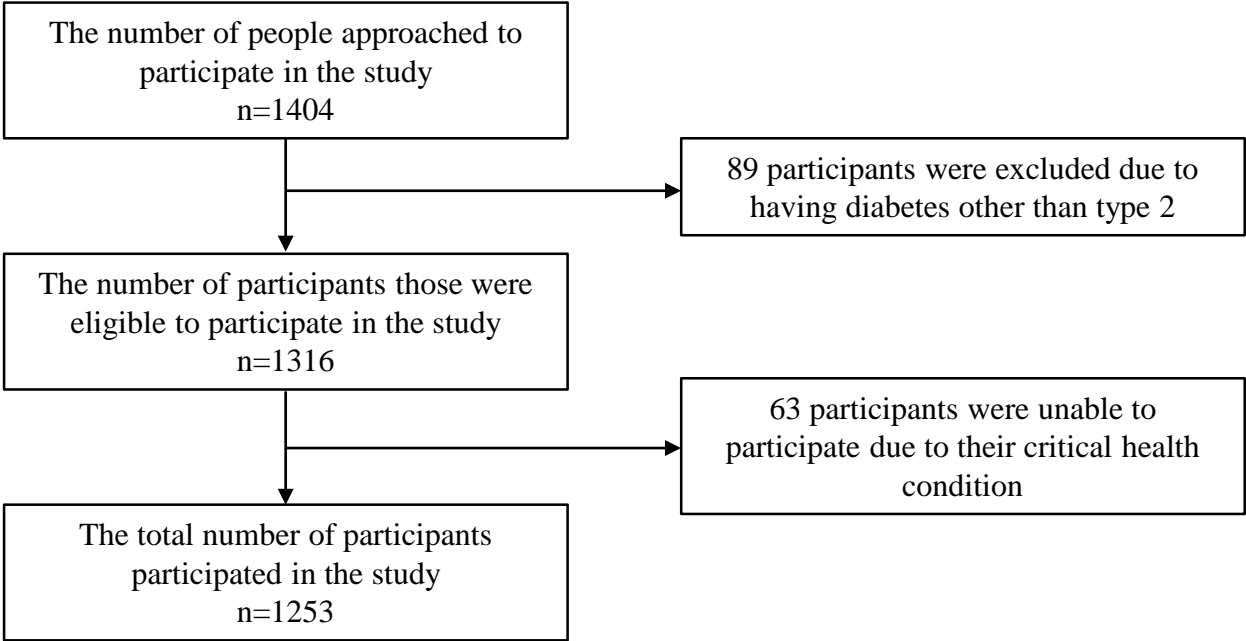

Supplement: MOESM1 [file 17107298]
